# Supplementary material for: The natural compound Jatrophone interferes with Wnt/β-catenin signaling and inhibits proliferation and EMT in human triple-negative breast cancer
Source: PubMed Central journal article supplement (PMC5744972; doi:10.1371/journal.pone.0189864), 2017-12-27
Supplement: pone.0189864.s002.pdf [file pone.0189864.s002.pdf]

**Suppl. Information:****Table 1.** Primer sequences used for qPCR:

| <b>Primer</b>       | <b>Sequence</b>                         | <b>Orientation</b> |
|---------------------|-----------------------------------------|--------------------|
| <i>hWNT10B</i>      | 5'-TGG GAT GTG TAG CCT TCT CC-3'        | S                  |
|                     | 5'-CCC AGC CAA AAG GAG TAT GA-3'        | AS                 |
| <i>hCDK4</i>        | 5'-TCA TGC CAA TTG CAT CGT TCA CCG -3'  | S                  |
|                     | 5'-ACA GGT GTT GCA TAT GTG GAC TGC -3'  | AS                 |
| <i>hCCND1</i>       | 5'-CAG AAG TGC GAA GAG GAG GTC-3'       | S                  |
|                     | 5'-TCA TCT TAG AGG CCA CGA ACA T-3'     | AS                 |
| <i>hCCNE1</i>       | 5'-TTA CCC AAA CTC AAC GTG CAA GCC-3'   | S                  |
|                     | 5'- AGA GGG TGT TGC TCA AGA AAG TGC-3'  | AS                 |
| <i>hCCNA1</i>       | 5'- TGT CTG TTC TGA GAG GGA AAC TGC -3' | S                  |
|                     | 5'- AAG GAG AAA CTG GTT GGT GGT TGG -3' | AS                 |
| <i>hCCNB1</i>       | 5'- ATT GTG TGC CCA AGA AGA TGC TGC -3' | S                  |
|                     | 5'- TTA GAT GCT CTC CGA AGG AAG TGC-3'  | AS                 |
| <i>hBIRC5</i>       | 5'- CCG CAT CTC TAC ATT CAA GAA CTG GC  | S                  |
|                     | 5'- TTG ACA GAA AGG AAA GCG CAA CCG -   | AS                 |
| <i>hAXIN2</i>       | 5'-TCA AGT GCA AAC TTT CGC CAA CCG-3'   | S                  |
|                     | 5'-TGG TGC AAA GAC ATA GCC AGA ACC-3'   | AS                 |
| <i>hMYC</i>         | 5'-TCT CCA CAC ATC AGC ACA ACT ACG-3'   | S                  |
|                     | 5'-TGT GTT CGC CTC TTG ACA TTC TCC-3'   | AS                 |
| <i>hHMGA2</i>       | 5'-TCCGTGCCCGACCCTAT-3'                 | S                  |
|                     | 5'-CCTTGAAATGTTAGGCGGGG -3'             | AS                 |
| <i>hPCNA</i>        | 5'- TGT AAA CCT GCA GAG CAT GGA CTC G-  | S                  |
|                     | 5'- AAA TAC TAG CGC CAA GGT ATC CGC-3'  | AS                 |
| <i>hSLUG</i>        | 5'- TTT CTG GGC TGG CCA AAC ATA AGC -3' | S                  |
|                     | 5'- AAT GTG TCC TTG AAG CAA CCA GGG -3' | AS                 |
| <i>hFIBRONECTIN</i> | 5'- TGT CAA CGA AGG CTT GAA CCA ACC -3' | S                  |
|                     | 5'- AGT TCA CAC CAT TGT CAT GGC ACC -3' | AS                 |
| <i>hVIMENTIN</i>    | 5'-ATG AAA GTG TGG CTG CCA AGA ACC-3'   | S                  |
|                     | 5'-TCT CTT CCA TTT CAC GCA TCT GGC-3'   | AS                 |
| <i>hZEB1</i>        | 5'-ATG CAC AAC CAA GTG CAG AAG AGC-3'   | S                  |
|                     | 5'-AGG CTG ATC ATT GTT CTT GGC AGG-3'   | AS                 |
| <i>h18S</i>         | 5'- CCG CGG TTC TAT TTT GTT GGT -3'     | S                  |
|                     | 5'- CTC TAG CGG CGC AAT ACG A -3'       | AS                 |

**Legend: Antisense (AS), Sense (S), and human (h).**
